# Supplementary material
Source: PubMed Central journal article supplement (PMC4143017)
Supplement: 1407370111_pnas.201407370SI.pdf [file 1407370111_pnas.201407370SI.pdf]

# Supporting Information

Kobayashi et al. 10.1073/pnas.1407370111

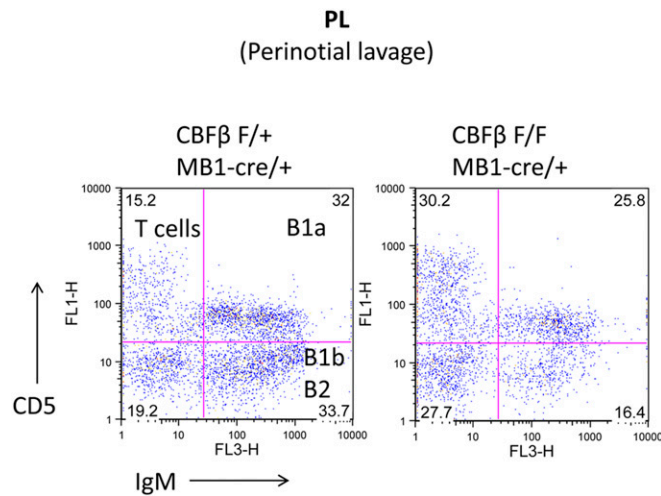

**Fig. S1.** The number of B-1a cells as well as B-2 cells is reduced in core-binding factor beta (*CBFβ*)<sup>F/F</sup>:mb1-cre/+ mice. Peritoneal cells were collected from *Cbfb*<sup>F/+</sup>:mb1-cre/+ and *Cbfb*<sup>F/F</sup>:mb1-cre/+ mice. The percentage of B-1a cell population as well as B-1b and B-2 in *Cbfb*<sup>F/+</sup>:mb1-cre/+ mice was slightly decreased. Total cell numbers of B-cell subsets were reduced to one third of *Cbfb*<sup>F/+</sup>:mb1-cre/+ mice.

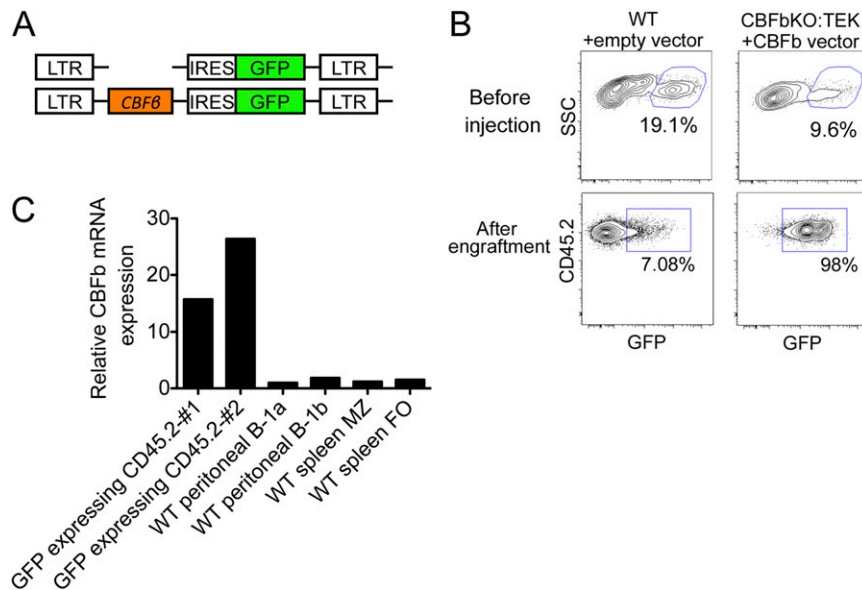

**Fig. S2.** *Cbfb* overexpression by retrovirus in *Cbfb*<sup>-/-</sup>:endothelial-specific receptor tyrosine kinase (*Tek*)-*GFP/Cbfb* fetal-liver cells. (A) The retrovirus construct [MSCV-IRES-GFP (MIG)] for *Cbfb* overexpression (or control). (B) *Cbfb*-*GFP* expression in WT (Left) and *Cbfb*<sup>-/-</sup>:*Tek*-*GFP/Cbfb* (Right) fetal-liver cells 24 h after transduction (Upper) and after engraftment in the recipient peritoneal cavity (Lower). (C) Quantitative *Cbfb* expressions in *Cbfb* retrovirus-infected donor-derived cells and WT B-cell subsets. CD45.2<sup>+</sup> donor-derived cells were sorted from recipient mice transplanted with *Cbfb*<sup>-/-</sup>:*Tek*-*GFP/Cbfb* fetal-liver cells infected with *Cbfb* retrovirus, and *Cbfb* expressions were examined in donor-derived cells (GFP expressing CD45.2-#1, and CD45.2-#2) and WT B-cell subsets in the peritoneal cavity and spleen.

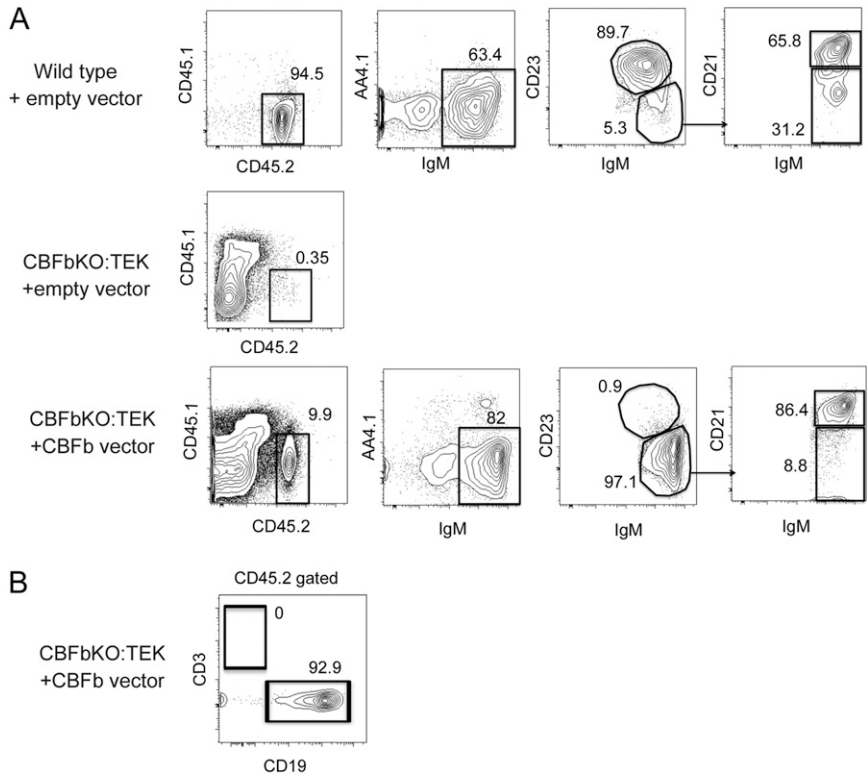

**Fig. S3.** Overexpression of *Cbfb* rescued *Cbfb*<sup>-/-</sup>:*Tek*-GFP/*Cbfb* fetal liver cell-derived MZ cell engraftment in the recipient spleen. (A) Spleen cells of recipient mice transplanted with fetal-liver cells from WT with empty vector (Top), *Cbfb*<sup>-/-</sup>:*Tek*-GFP/*Cbfb* fetal-liver cells expressing empty vector control (Middle), and *Cbfb* vector (Bottom). (B) Spleen cells of recipient mice transplanted with *Cbfb*<sup>-/-</sup>:*Tek*-GFP/*Cbfb* fetal-liver cells expressing *Cbfb* vector. Donor CD45.2 gated. Representative FACS dot plots were depicted from two sets of experiments.
